# Supplementary material for: How Elemental Stoichiometric Ratios in Microorganisms Respond to Thinning Management in Larix principis-rupprechtti Mayr. Plantations of the Warm Temperate Zone in China
Source: MDPI journal article supplement (doi:10.3390/f12060684), 2021-05-27
Supplement: s1 [file s1]

**Table S1.** Characteristics of different thinning management sites in *L. principis-rupprechtii* plantations.

| Thinning treatment | Sampling site basic conditions |                  |                        |                    |                  |
|--------------------|--------------------------------|------------------|------------------------|--------------------|------------------|
|                    | Stand density<br>(trees/ha)    | Elevation<br>(m) | Slope Gradients<br>(°) | Mean height<br>(m) | Mean DBH<br>(cm) |
| Control            | 2095                           | 2327±16          | 24                     | 14.19±2.11         | 15.01±0.50       |
| HDP                | 1785                           | 2335±3           | 24                     | 14.06±1.97         | 14.85±0.65       |
| MDP                | 1376                           | 2346±6           | 25                     | 15.86±0.91         | 15.96±0.42       |
| LDP                | 1060                           | 2340±10          | 23                     | 15.41±2.18         | 16.81±0.54       |

Values: mean ± standard error. Different small letters: the variation of soil indicators in 4 thinning treatments ( $p < 0.05$ ).  
 DBH: diameter at breast height; Control: control site; LDP: low density plantation; MDP: medium density plantation;  
 HDP: high density plantation.

**Table S2.** PLFAs biomarkers selected to characterize microorganism community structure.

| Microbial community types                  | PLFAs                                                                                                              | Reference                                                                                                       |
|--------------------------------------------|--------------------------------------------------------------------------------------------------------------------|-----------------------------------------------------------------------------------------------------------------|
| Gram - positive bacteria (G <sup>+</sup> ) | i13:0, i14:0, a14:0, a15:0, i15:0, i16:0, a17:0, i17:0, i18:0                                                      | Fichtner et al. (2014), Kourtev et al. (2002)                                                                   |
| Gram – negative bacteria (G <sup>-</sup> ) | 10:0 2OH, 15:1 w4c, 15:1 w6c, 16:0 2OH, 16:1 w6c, 16:1 w7c, 16:1 w9c, cy17:0, 17:1 w8c, 18:1 w5c, 18:1 w7c, cy19:0 | Bossio et al. (2006), Fichtner et al. (2014), Gavazov et al. (2017)                                             |
| Bacteria                                   | G <sup>+</sup> , G <sup>-</sup> , 14:0, 15:0, 17:0, 18:0                                                           | Bossio et al. (2006), Fichtner et al. (2014), Gavazov et al. (2017), Kourtev et al. (2002), Myers et al. (2001) |
| Fungi                                      | 16:1 w5c, 18:1 w9c, 18:2 w6c, 18:2 w9c                                                                             | Kourtev et al. (2002), Zhang et al. (2014)                                                                      |
| Actinomycete                               | 10 Me 16:0, 10 Me 17:0, 10 Me 18:0                                                                                 | Brockett et al. (2012)                                                                                          |

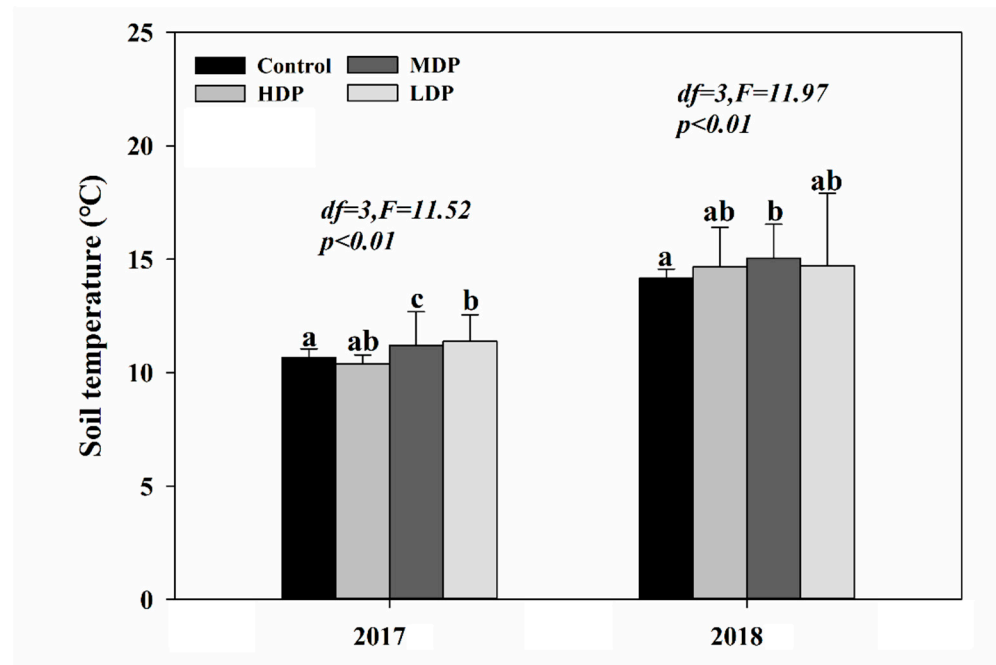

**Figure S1.** Effect of forest thinning on soil temperature in *L. principis-rupprechtii* plantations. Error bars indicate standard error (n = 3). Different lowercase letters:  $p < 0.05$ , significant difference between treatments. Control: control site; LDP: low density plantation; MDP: medium density plantation; HDP: high density plantation.
